# Supplementary material for: Structural basis of DUX4/IGH-driven transactivation
Source: PubMed Central journal article supplement (PMC5990521; doi:10.1038/s41375-018-0093-1), 2018-03-15

# Supplementary Figure 6 Dong et al, 2018

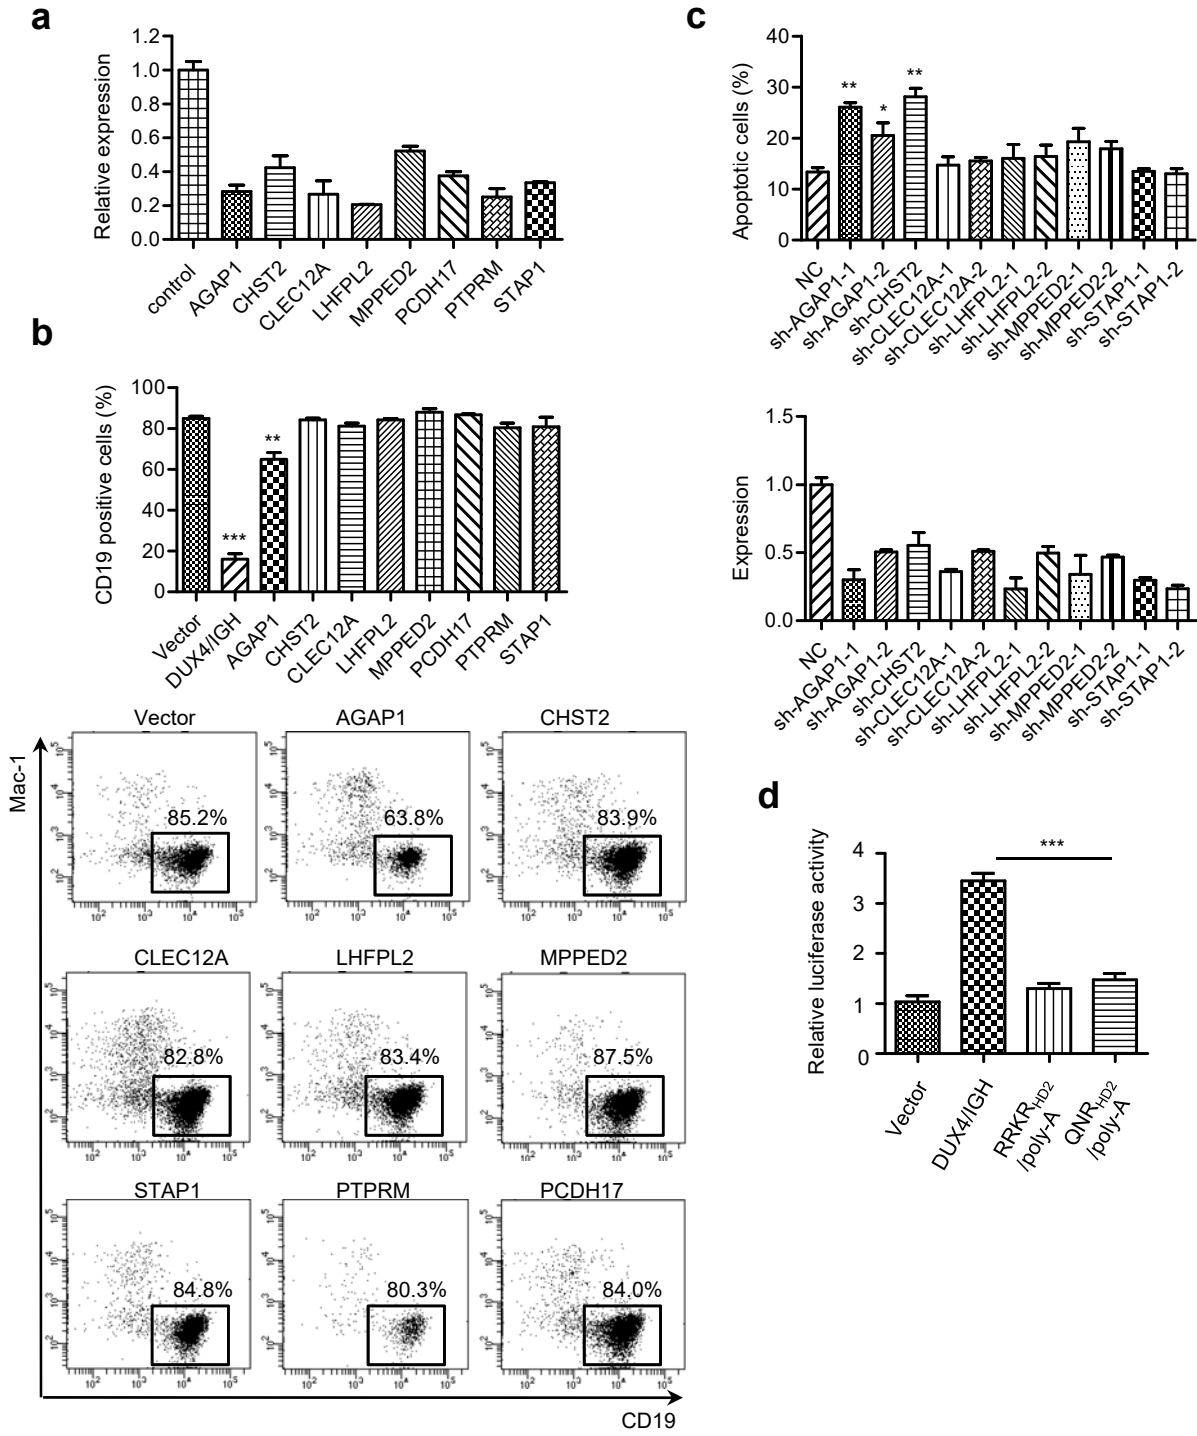

Supplement: 41375_2018_93_MOESM9_ESM.pdf [file 41375_2018_93_MOESM9_ESM.pdf]
